# Supplementary material for: Early warning systems in obstetrics: A systematic literature review
Source: PubMed Central journal article supplement (PMC6544303; doi:10.1371/journal.pone.0217864), 2019-05-31
Supplement: pone.0217864.s001.pdf [file pone.0217864.s001.pdf]

## Appendices

### Appendix A: Combination of Search terms

| Intervention terms  | Outcome terms               |
|---------------------|-----------------------------|
| “early warning”     | “maternal mortality” (MeSH) |
| “early detection”   | “maternal morbidity” (MeSH) |
| “track and trigger” | “obstet* complication”      |
| “monitoring chart”  | “obstet* haemorrhage”       |
| “vital\$ chart”     | “matern* outcome”           |
| EWS                 | “matern* sepsis”            |
| MOEWS               | “eclampsia”                 |
| MEOWS               | “chorioamnionitis”          |

### Appendix B1: Quality assessment tool

| Domain                                       | Signalling questions                                        | Scoring                                                                              |                      |
|----------------------------------------------|-------------------------------------------------------------|--------------------------------------------------------------------------------------|----------------------|
| <b>Patient selection</b><br><br>Risk of bias | Was a continuous or random sample of participants enrolled? | Yes<br>No<br>Unclear                                                                 |                      |
|                                              | Did the study avoid unnecessary exclusions?                 | Yes<br>No<br>Unclear                                                                 |                      |
|                                              | Applicability concern                                       | Are there concerns that the included participants do not match the review questions? | Yes<br>No<br>Unclear |
|                                              | <b>Index test</b><br><br>Risk of bias                       | Were the reference range adjusted for physiological change in pregnancy?             | Yes<br>No<br>Unclear |
|                                              |                                                             | Was the trigger threshold prespecified?                                              | Yes                  |

|                             |                                                                                                                        |         |
|-----------------------------|------------------------------------------------------------------------------------------------------------------------|---------|
|                             |                                                                                                                        | No      |
|                             |                                                                                                                        | Unclear |
| Applicability concern       | Are there concerns that the index test, its conduct or interpretation differ from review questions?                    | Yes     |
|                             |                                                                                                                        | No      |
|                             |                                                                                                                        | Unclear |
| <b>Reference standard</b>   | Is the index test compared to a reference standard                                                                     | Yes     |
|                             |                                                                                                                        | No      |
| Risk of bias                |                                                                                                                        | Unclear |
|                             | Were the reference standard results interpreted without knowledge of the results of the index test                     | Yes     |
|                             |                                                                                                                        | No      |
|                             |                                                                                                                        | Unclear |
| Applicability concern       | Are there concerns that the target condition as defined by the reference standard does not match the review questions? | Yes     |
|                             |                                                                                                                        | No      |
|                             |                                                                                                                        | Unclear |
| <b>Flow of participants</b> | Is the attrition rate acceptable (<20%)?                                                                               | Yes     |
|                             |                                                                                                                        | No      |
| Risk of bias                |                                                                                                                        | Unclear |
| Applicability concern       | Could the drop out participants or missing data be systematically similar to those who completed?                      | Yes     |
|                             |                                                                                                                        | No      |
|                             |                                                                                                                        | Unclear |

[Appendix B2: QUADAS-2 Scoring guideline \(order of answers not important\)](#)

| Risk of bias |            |            |
|--------------|------------|------------|
| Score        | Question 1 | Question 2 |
| <b>Low</b>   | Yes        | Yes        |
|              | Yes        | Unclear    |
| <b>High</b>  | No         | No         |
|              | No         | Unclear    |

|                                    |         |         |
|------------------------------------|---------|---------|
| <b>Unclear</b>                     | Yes     | No      |
|                                    | Unclear | Unclear |
| <b>Concern about applicability</b> |         |         |
| <b>Low</b>                         | Yes     |         |
| <b>High</b>                        | No      |         |
| <b>Unclear</b>                     | Unclear |         |

### Appendix C: Quality of individual studies

| Study                         | RISK OF BIAS      |            |                    |                   | CONCERN ABOUT APPLICABILITY |            |                    |
|-------------------------------|-------------------|------------|--------------------|-------------------|-----------------------------|------------|--------------------|
|                               | Patient selection | Index test | Reference standard | Participants flow | Patient selection           | Index test | Reference standard |
| Singh S et al, 2012           | L                 | L          | H                  | L                 | L                           | L          | L                  |
| Carle C et al, 2013           | L                 | L          | L                  | U                 | L                           | L          | U                  |
| Singh A et al, 2016           | L                 | L          | H                  | L                 | L                           | L          | U                  |
| Hedriana HL et al, 2016       | U                 | L          | U                  | L                 | L                           | L          | H                  |
| Ryan HM et al, 2017           | L                 | L          | H                  | L                 | L                           | L          | L                  |
| Paternino-Caicedo et al, 2017 | U                 | L          | L                  | L                 | L                           | L          | L                  |
| Edwards ES et al, 2015        | U                 | L          | L                  | H                 | L                           | L          | L                  |
| Lappen RJ et al, 2010         | U                 | U          | L                  | H                 | L                           | H          | U                  |
| Von-Dadelszen P et al, 2011   | L                 | L          | U                  | L                 | L                           | H          | U                  |
| Payne BA et al,               | L                 | L          | U                  | L                 | L                           | H          | U                  |

---

2014

Nathan HL et al,  
2017

---

L U H L L U H

Austin DM et al,  
2013

---

H L U L L U U

Maguire PJ et al,  
Karen AP 2015

---

L L U U L L U

Maguire PJ, Amy  
C.O et al, 2015

---

L L U H L L U

Shields E L et al  
2016

---

L L U H L L L

Sheikh S et al,  
2017

---

L H U L L H U

Merriell A et al,  
2017

---

U L U L L L U

---

L = Low, H = High, U=Unclear
